# Supplementary material for: Trap-regulated highly efficient mechanoluminescence and persistent mechanoluminescence of Ca2MgSi2O7:Eu2+
Source: Royal Society of Chemistry journal article supplement (doi:10.1039/d3tc02030d), 2023-01-01
Supplement: d3tc02030d1.pdf [file d3tc02030d1.pdf]

# **Trap-regulated highly efficient mechanoluminescence and persistent mechanoluminescence of $\text{Ca}_2\text{MgSi}_2\text{O}_7:\text{Eu}^{2+}$**

Yingjuan Yan,<sup>a,b,c</sup> Shaofan Fang,<sup>b</sup> Yanyan Li,<sup>a\*</sup> Yixuan Xu,<sup>a</sup> Yingdan Song,<sup>a</sup> Zhidong Ma,<sup>c</sup>  
Yaru Shi,<sup>a</sup> Lei Zhao,<sup>a\*</sup> Zhaofeng Wang,<sup>b,c\*</sup>

<sup>a</sup> *School of Physics and Opto-Electronic Technology, Collaborative Innovation Center of  
Rare-Earth Optical Functional Materials and Devices Development, Baoji University of Arts  
and Sciences, Baoji, Shaanxi 721016, P. R. China.*

<sup>b</sup> *Shandong Laboratory of Yantai Advanced Materials and Green Manufacturing, Yantai,  
Shandong 265503, China*

<sup>c</sup> *State Key Laboratory of Solid Lubrication, Lanzhou Institute of Chemical Physics, Chinese  
Academy of Sciences, Lanzhou, Gansu 730000, China*

\*Authors to whom correspondence should be addressed:

Dr. Yanyan Li, Email: shuishouly@126.com (Y. Li)

Dr. Lei Zhao, Email: zhaoleibjwl@163.com (L. Zhao)

Dr. Zhaofeng Wang, Tel: +86-931-4968682; Email: zhfwang@licp.cas.cn (Z. Wang)

## 1. Fabrication of ML composites

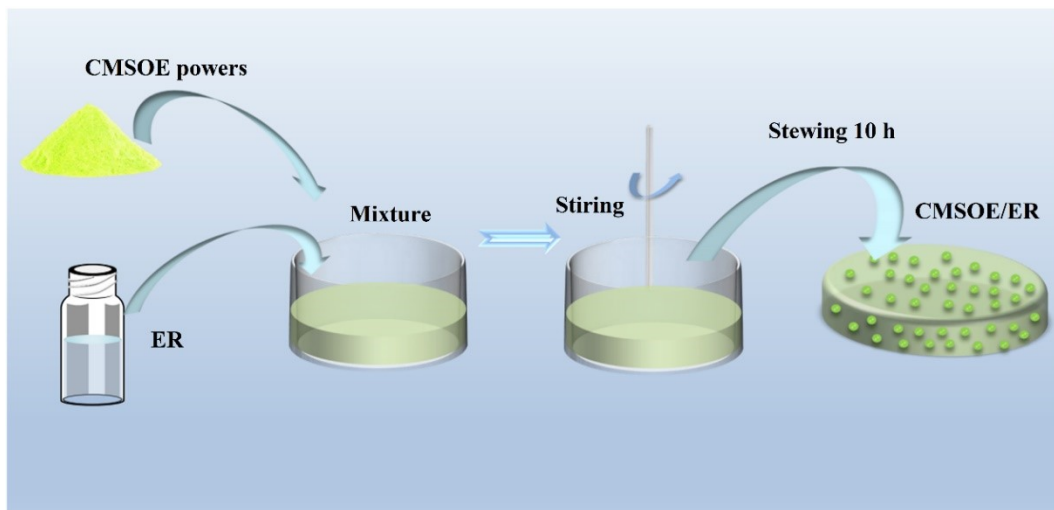

Figure S1. Schematic diagram of the preparation processes of CMSE/ER composites.

## 2. Trap structure evolution

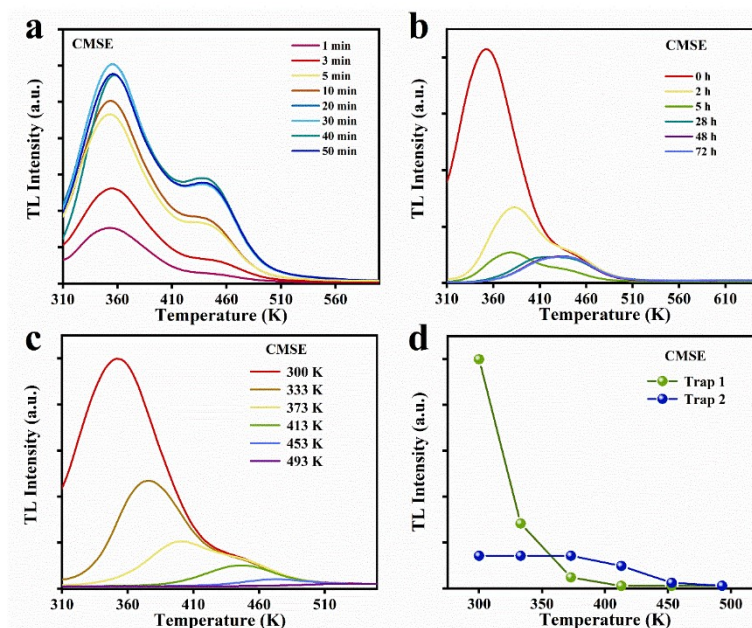

Figure S2. (a) TL spectra of CMSE after different charging times; (b) TL spectra of CMSE which was pre-charged for 1 min and then placed in darkness for various times; (c) TL spectra of CMSE after 1 min pre-charging and treated at various temperature for 10 min. (d) Corresponding TL intensity variations of CMSE in (c).

### 3. High temperature LPL

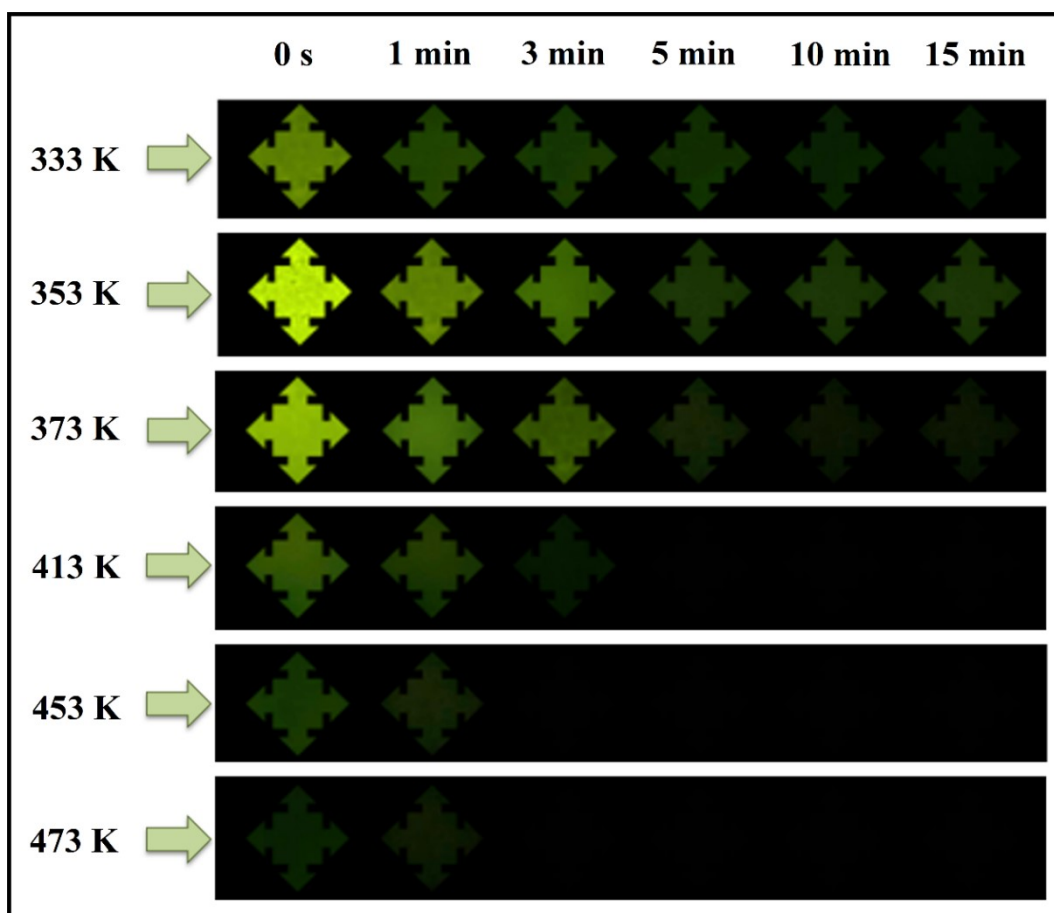

Figure S3. Optical photos of afterglow attenuation at different temperature (333 K, 353 K, 373 K, 413 K, 453 K, 473 K). The samples were pre-charged by 254 nm and 365 nm light for 1 min.

#### 4. Cyclic ML performance

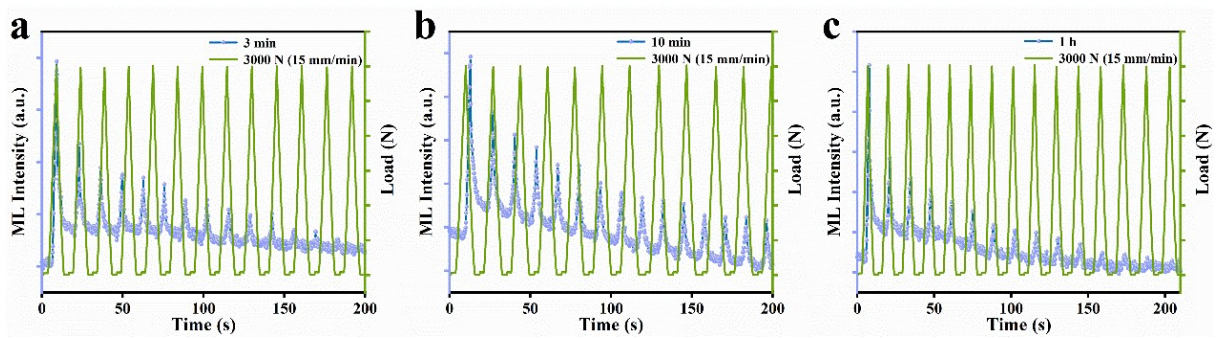

Figure S4. The ML intensity variations under cyclic compression conditions of the samples after pre-irradiated for various time: (a) 3 min; (b) 10 min; (c) 1 h.

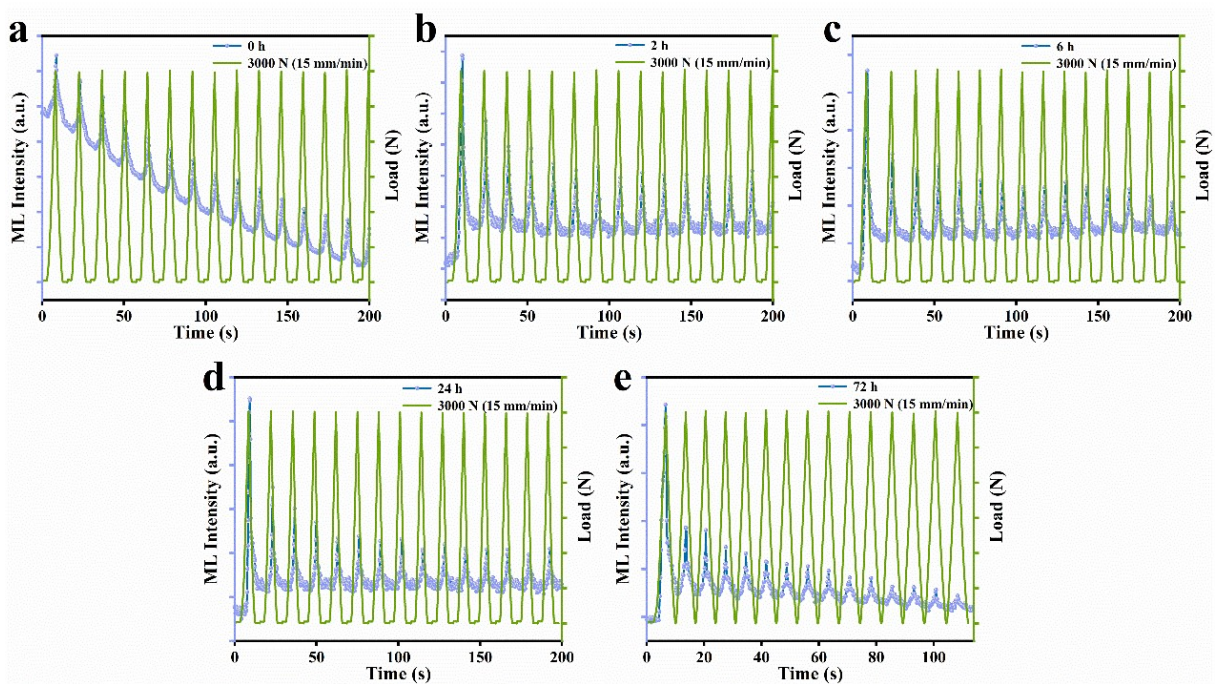

Figure S5. The ML intensity variations under cyclic compression conditions of the samples after placed in dark for various durations: (a) 0 h; (b) 2 h; (c) 6 h; (d) 24 h; (e) 72 h.



## 5. Characterizations of CMSEH

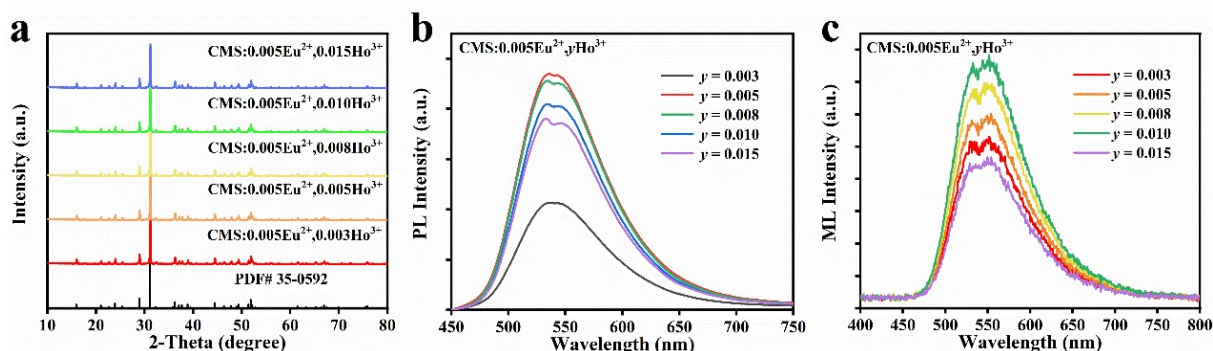

Figure S6. (a) XRD patterns of  $\text{Ca}_{1.995-y}\text{MgSi}_2\text{O}_7:0.005\text{Eu}^{2+}, y\text{Ho}^{3+}$  ( $y = 0.003, 0.005, 0.008, 0.01, 0.015$ ) samples; (b) PL spectra of  $\text{Ca}_{1.995-y}\text{MgSi}_2\text{O}_7:0.005\text{Eu}^{2+}, y\text{Ho}^{3+}$  ( $y = 0.003, 0.005, 0.008, 0.01, 0.015$ ) excited by 397 nm; (c) ML spectra of  $\text{Ca}_{1.995-y}\text{MgSi}_2\text{O}_7:0.005\text{Eu}^{2+}, y\text{Ho}^{3+}$  ( $y = 0.003, 0.005, 0.008, 0.01, 0.015$ ) under friction (load: 10 N, rotation speed: 1000 rpm).

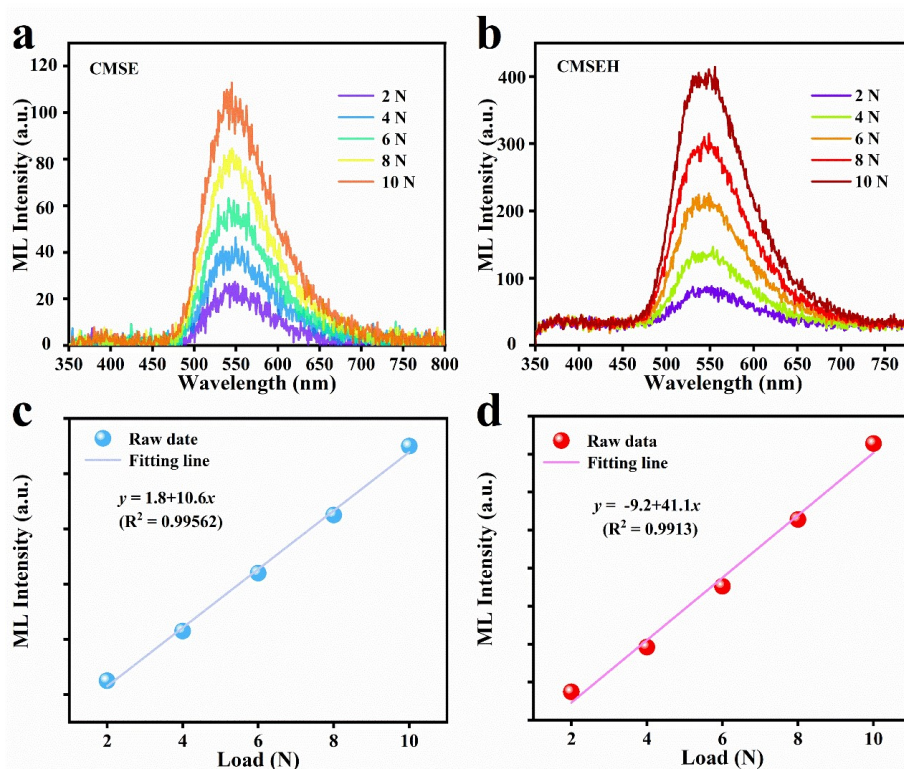

Figure S7. ML spectra of (a) CMSE/ER and (b) CMSEH/ER under different loads; Relationship between the ML intensity and applied load in (c) CMSE/ER and (d) CMSEH/ER.
